# Supplementary material for: Corrosion inhibition and disinfection of central heating and cooling water systems using in situ generated hydrogen peroxide
Source: Royal Society of Chemistry journal article supplement (doi:10.1039/d2nj03806d), 2022-01-01
Supplement: d2nj03806d1.pdf [file d2nj03806d1.pdf]

**Electronic Supplementary Information**

**Corrosion Inhibition and Disinfection of Heating and Cooling  
Water Systems Using In Situ Generated Hydrogen Peroxide**

*Ye Cao,<sup>a</sup> Yue Xu,<sup>a</sup> Qi Li,<sup>a</sup> Ruth-Sarah Rose,<sup>b</sup> Isaac Abrahams,<sup>a</sup> Christopher R. Jones<sup>a</sup> and Tippu S. Sheriff<sup>\*a</sup>*

<sup>a</sup>Department of Chemistry, School of Physical and Chemical Sciences, Queen Mary University of  
London, London, E1 4NS, UK.

<sup>b</sup>School of Biological and Behavioural Sciences, Queen Mary University of London, London, E1  
4NS, UK.

**\*Corresponding Author:** [t.s.sheriff@qmul.ac.uk](mailto:t.s.sheriff@qmul.ac.uk)

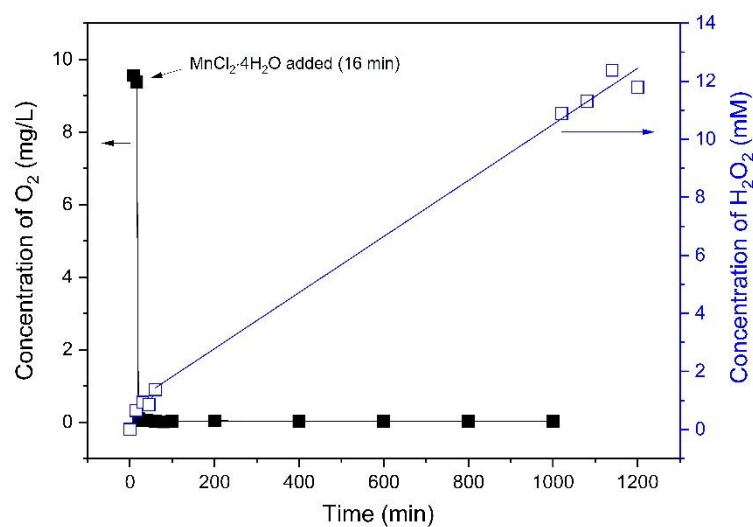

**Fig. S1** The change of dissolved  $O_2$  concentration (—■—) and  $H_2O_2$  concentration (—□—) in the formulation. Experiment conditions: [Tiron] = 1.50 mM,  $[NH_2OH]$  = 500 mM,  $[MnCl_2 \cdot 4H_2O]$  = 50.0  $\mu$ M, initial pH: 9.0, [carbonate] = 50.0 mM, temperature:  $20 \pm 1$  °C.

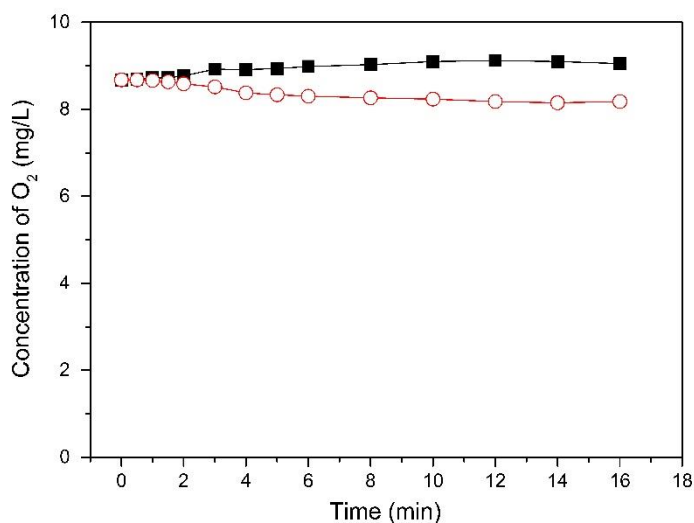

**Fig. S2** The change of dissolved  $O_2$  concentration in the formulation in the presence (—■—) and absence of EDTA (—○—). Experiment conditions:  $[NH_2OH]$  = 500 mM, [EDTA] = 1.00 mM,  $[MnCl_2 \cdot 4H_2O]$  = 50.0  $\mu$ M, initial pH: 9.0, [carbonate] = 50.0 mM, temperature:  $20 \pm 1$  °C.

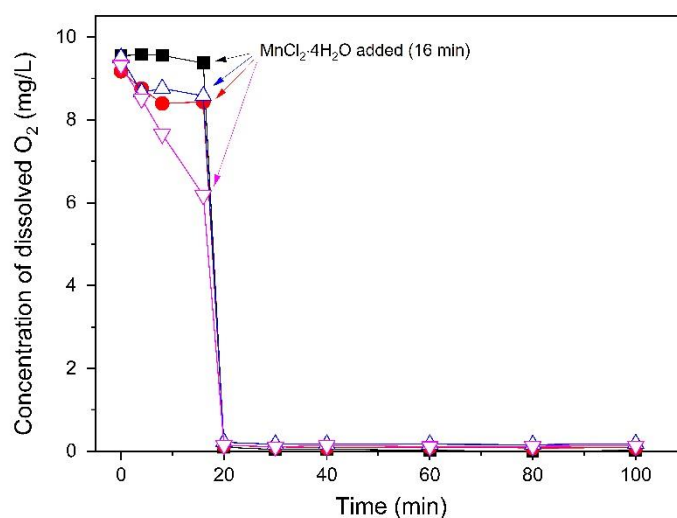

**Fig. S3** The change of dissolved O<sub>2</sub> in the formulation at 20 ± 1 °C ( —■— ), 30 ± 1 °C ( —●— ), 40 ± 1 °C ( —△— ) and 50 ± 1 °C ( —▽— ). Experiment conditions: [Tiron] = 1.50 mM, [NH<sub>2</sub>OH] = 500 mM, [MnCl<sub>2</sub>·4H<sub>2</sub>O] = 50.0 μM, initial pH: 9.0, [carbonate] = 50.0 mM.

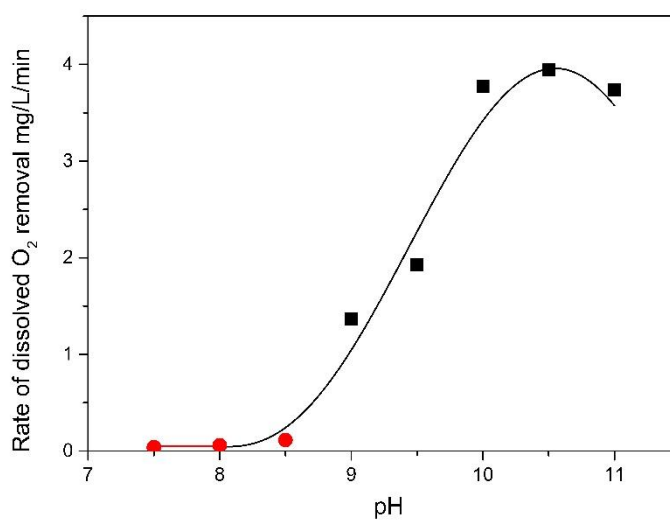

**Fig. S4** The influence of buffer and pH on the dissolved O<sub>2</sub> removal rate in the formulation with either phosphate ( ● ) or carbonate ( ■ ) buffer. Experiment conditions: [Tiron] = 1.50 mM, [NH<sub>2</sub>OH] = 500.0 mM, [carbonate] or [phosphate] = 50.0 mM, [MnCl<sub>2</sub>·4H<sub>2</sub>O] = 50.0 μM, temperature: 20 ± 1 °C.

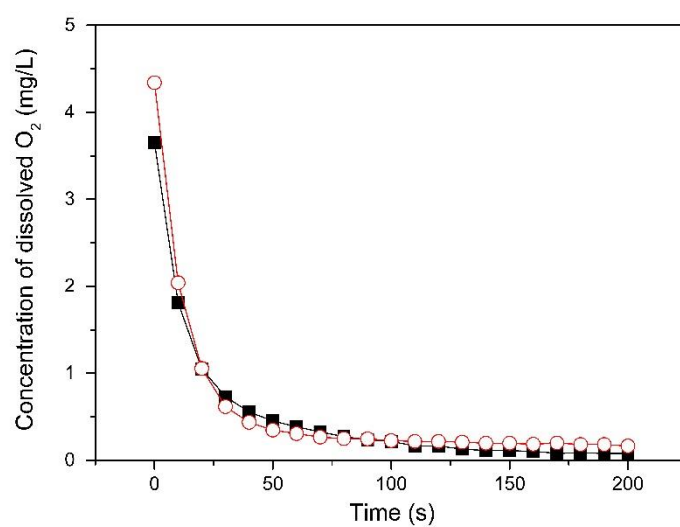

**Fig. S5** The change of dissolved O<sub>2</sub> concentration in the formulation with NH<sub>2</sub>OH ( —■— ) or ND<sub>2</sub>OD ( —○— ). Experiment conditions: [Tiron] = 1.50 mM, [NH<sub>2</sub>OH] or [ND<sub>2</sub>OD] = 500.0 mM, [MnCl<sub>2</sub>·4H<sub>2</sub>O] = 50.0 μM, initial pH: 9.0, [carbonate] = 50.0 mM, temperature: 20 ± 1 °C.

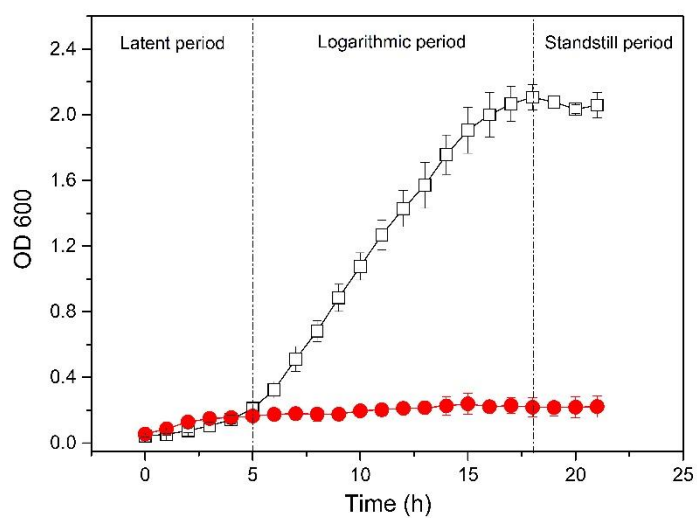

**Fig. S6** The growth curve of *E. coli* in minimal media in the presence ( —●— ) and absence ( —□— ) of the formulation. Culturing conditions: temperature:  $37 \pm 1$  °C. ( —□— ) no formulation, ( —●— ) [Tiron] = 1.50 mM, [NH<sub>2</sub>OH] = 500.0 mM, [phosphate] = 50.0 mM, [MnCl<sub>2</sub>·4H<sub>2</sub>O] = 50.0 μM, temperature:  $37 \pm 1$  °C.
